# Supplementary material for: Poly(alkylidenamines) dendrimers as scaffolds for the preparation of low-generation ruthenium based metallodendrimers
Source: Royal Society of Chemistry journal article supplement (doi:10.1039/c1nj20364a), 2011-01-01
Supplement: c1nj20364a.pdf [file c1nj20364a.pdf]

## Electronic Supplementary Information (ESI)

# Poly(alkylidenamines) dendrimers as scaffolds for the preparation of low-generation ruthenium based metallodendrimers

João Rodrigues,<sup>\*a</sup> Manuel G. Jardim,<sup>a</sup> João Figueira,<sup>a</sup> Marisol Gouveia,<sup>a</sup> Helena Tomás<sup>a</sup> and Kari Rissanen<sup>b</sup>

<sup>a</sup>CQM - Centro de Química da Madeira, MMRG, Universidade da Madeira, Campus Universitário da Penteada, 9000-390 Funchal, Portugal

<sup>b</sup>Department of Chemistry, NanoScience Center, University of Jyväskylä, P. O. Box 35, 40014 JYU, Finland

\*E-mail: [joaor@um.pt](mailto:joaor@um.pt); [www.uma.pt/jrmrg](http://www.uma.pt/jrmrg)

### 1. Experimental:

<sup>31</sup>P {<sup>1</sup>H} NMR spectra were recorded with a Bruker Ultrashield Avance II + 400 spectrometer (1H: 400.20 MHz, <sup>31</sup>P: 161.97 MHz) in [D<sub>6</sub>]DMSO, at 298,15 K (probe temperature). The chemical shifts (δ) are reported in ppm downfield and referenced to external 85% H<sub>3</sub>PO<sub>4</sub> (δ = 0.00 ppm).

### 2. Complementary <sup>31</sup>P NMR spectra (degradation studies):

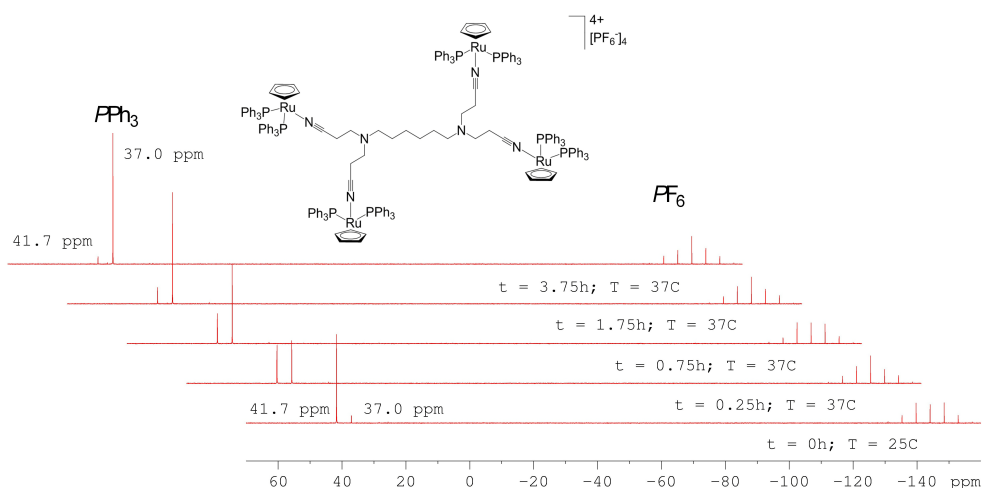

Fig. 1: <sup>31</sup>P NMR spectrum of metallodendrimer (8) in [D<sub>6</sub>]DMSO at 37°C, at different time periods of incubation.

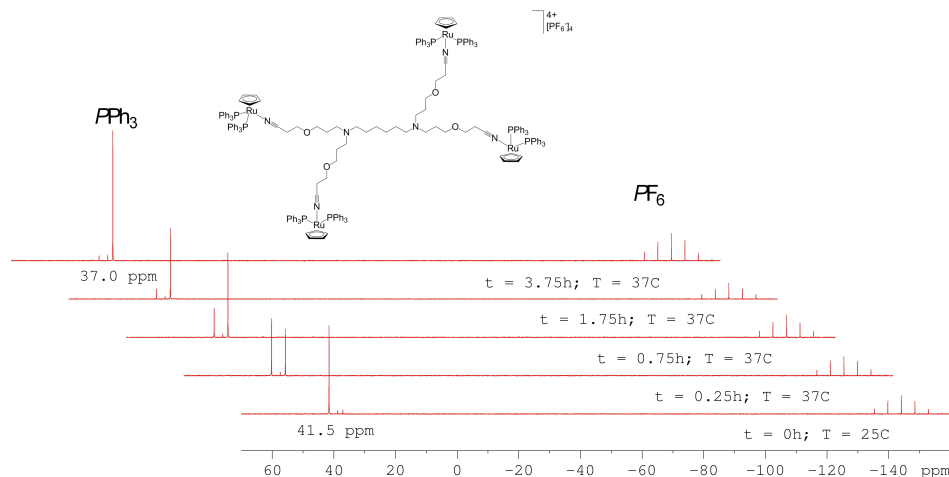

Fig. 2: <sup>31</sup>P NMR spectrum of metallodendrimer (9) in [D<sub>6</sub>]DMSO at 37°C, at different time periods of incubation.

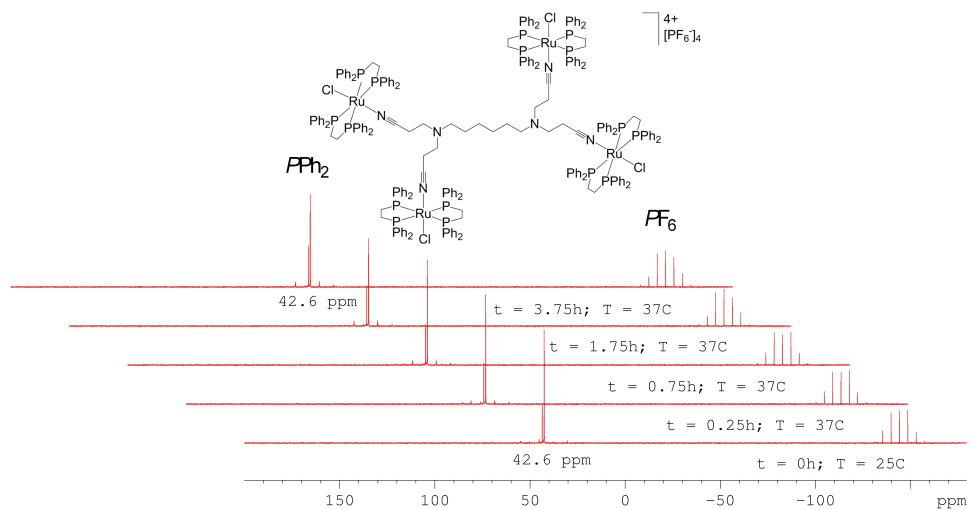

Fig. 3.  $^{31}\text{P}$  NMR spectrum of metallo-dendrimer (**10**) in [D<sub>6</sub>]DMSO at 37°C, at different time periods of incubation.
